# Supplementary material for: On the significance of the different geometrical and dosimetric parameters in microbeam and minibeam radiation therapy a retrospective evaluation
Source: Front Oncol. 2024 Sep 27;14:1449293. doi: 10.3389/fonc.2024.1449293 (PMC11472836; doi:10.3389/fonc.2024.1449293)
Supplement: Supplementary file 1 [file Table1.xlsx]

## Sheet: Sheet1
Facility	Authors	Title	Publication Date	Journal	DOI	Volume Average Dose (Gy)	Peak Dose (Gy)	Valley Dose (Gy)	% Peak Dose	% Valley Dose	PVDR	Width (um)	Spacing (um)	Valley Width (um)	Result						NTSS
Grenoble, France; INSERM, U836, Grenoble, France; Universite ́ Joseph Fourier, Grenoble Institut des Neurosciences, Grenoble, France; Oncodesign Biotechnology, Dijon, France; Department of Medical Physics, Karolinska Hospital, Stockholm, Sweden; kUniversite ́ de Toulouse; UPS, Toulouse, France; Centre de Recherche Cerveau et Cognition, France; CNRS; CerCo, Toulouse, France; Faculty of Pharmacy, U…	AUDREY BOUCHET, BENJAMIN LEMASSON, GERALDINE LE DUC, CECILE MAISIN, ELKE BRAUER-KRISCH, ERIK ALBERT SIEGBAHN, LUC RENAUD, ENAM KHALIL, CHANTAL RE ́ MY, CATHY POILLOT, ALBERTO BRAVIN, JEAN A. LAISSUE, EMMANUEL L. BARBIER, AND RAPHAEL SERDUC	Preferential Effect of Synchrotron Microbeam Radiation Therapy on Intracerebral 9L Gliosarcoma Vascular Networks	2010	International Journal of Radiation Oncology*Biology*Physics	10.1016/j.ijrobp.2010.06.021	96.875	350	12.5	0.25	0.75	28	50	200	150	No changes						5
Grenoble, France; INSERM, U836, Grenoble, France; Universite ́ Joseph Fourier, Grenoble Institut des Neurosciences, Grenoble, France; Oncodesign Biotechnology, Dijon, France; Department of Medical Physics, Karolinska Hospital, Stockholm, Sweden; kUniversite ́ de Toulouse; UPS, Toulouse, France; Centre de Recherche Cerveau et Cognition, France; CNRS; CerCo, Toulouse, France; Faculty of Pharmacy, U…	AUDREY BOUCHET, BENJAMIN LEMASSON, GERALDINE LE DUC, CECILE MAISIN, ELKE BRAUER-KRISCH, ERIK ALBERT SIEGBAHN, LUC RENAUD, ENAM KHALIL, CHANTAL RE ́ MY, CATHY POILLOT, ALBERTO BRAVIN, JEAN A. LAISSUE, EMMANUEL L. BARBIER, AND RAPHAEL SERDUC	Preferential Effect of Synchrotron Microbeam Radiation Therapy on Intracerebral 9L Gliosarcoma Vascular Networks	2010	International Journal of Radiation Oncology*Biology*Physics	10.1016/j.ijrobp.2010.06.021	96.875	350	12.5	0.25	0.75	28	50	200	150	No changes						5
Grenoble, France; INSERM, U836, Grenoble, France; Universite ́ Joseph Fourier, Grenoble Institut des Neurosciences, Grenoble, France; Oncodesign Biotechnology, Dijon, France; Department of Medical Physics, Karolinska Hospital, Stockholm, Sweden; kUniversite ́ de Toulouse; UPS, Toulouse, France; Centre de Recherche Cerveau et Cognition, France; CNRS; CerCo, Toulouse, France; Faculty of Pharmacy, U…	AUDREY BOUCHET, BENJAMIN LEMASSON, GERALDINE LE DUC, CECILE MAISIN, ELKE BRAUER-KRISCH, ERIK ALBERT SIEGBAHN, LUC RENAUD, ENAM KHALIL, CHANTAL RE ́ MY, CATHY POILLOT, ALBERTO BRAVIN, JEAN A. LAISSUE, EMMANUEL L. BARBIER, AND RAPHAEL SERDUC	Preferential Effect of Synchrotron Microbeam Radiation Therapy on Intracerebral 9L Gliosarcoma Vascular Networks	2010	International Journal of Radiation Oncology*Biology*Physics	10.1016/j.ijrobp.2010.06.021	96.875	350	12.5	0.25	0.75	28	50	200	150	No changes						5
Grenoble, France; INSERM, U836, Grenoble, France; Universite ́ Joseph Fourier, Grenoble Institut des Neurosciences, Grenoble, France; Oncodesign Biotechnology, Dijon, France; Department of Medical Physics, Karolinska Hospital, Stockholm, Sweden; kUniversite ́ de Toulouse; UPS, Toulouse, France; Centre de Recherche Cerveau et Cognition, France; CNRS; CerCo, Toulouse, France; Faculty of Pharmacy, U…	AUDREY BOUCHET, BENJAMIN LEMASSON, GERALDINE LE DUC, CECILE MAISIN, ELKE BRAUER-KRISCH, ERIK ALBERT SIEGBAHN, LUC RENAUD, ENAM KHALIL, CHANTAL RE ́ MY, CATHY POILLOT, ALBERTO BRAVIN, JEAN A. LAISSUE, EMMANUEL L. BARBIER, AND RAPHAEL SERDUC	Preferential Effect of Synchrotron Microbeam Radiation Therapy on Intracerebral 9L Gliosarcoma Vascular Networks	2010	International Journal of Radiation Oncology*Biology*Physics	10.1016/j.ijrobp.2010.06.021	96.875	350	12.5	0.25	0.75	28	50	200	150	No changes						5
Université de Toulouse, UPS, Centre de Recherche Cerveau et Cognition, Toulouse, France, CNRS, CerCo, Toulouse, France, ESRF, Grenoble, France; Department of Medical Physics, Stockholm, Sweden; Inserm, U836, Grenoble, France, Université Joseph Fourier, Grenoble Institut des Neurosciences, UMR-S836, Grenoble, France; Department of Neurosurgery, CHU de Grenoble, Grenoble, France; Institute of Patho…	Raphaël Serduc, Elke Bräuer-Krisch, Erik A. Siegbahn, Audrey Bouchet, Benoit Pouyatos, Romain Carron, Nicolas Pannetier, Luc Renaud, Gilles Berruyer, Christian Nemoz, Thierry Brochard, Chantal Rémy, Emmanuel L. Barbier, Alberto Bravin, Géraldine Le Duc, Antoine Depaulis, François Estève, Jean A. Laissue	High-Precision Radiosurgical Dose Delivery by Interlaced Microbeam Arrays of High-Flux Low-Energy Synchrotron X-Rays	2010	PLOS ONE	10.1371/journal.pone.0009028	191.25	700	12.5	0.26	0.74	56	52	200	148	All rats irradiated in the right caudate nucleus survived the observation period of 1 month without any sign of neurological disorder; the evolution of their body weight was recorded as normal, slight hair loss was observed at the entrance site, no initial radiation-induced cerebral lesion but significant by 30 days						5
INSERM, U836, F-38043 Grenoble, France; Universit ́e Joseph Fourier, Grenoble Institut de Neurosciences, F-38043 Grenoble, France; Institute of Pathology, University of Bern, Switzerland; European Synchrotron Radiation Facility, F-38043 Grenoble, France	Serduc R, van de Looij Y, Francony G, Verdonck O, van der Sanden B, Laissue J, Farion R, Bräuer-Krisch E, Siegbahn EA, Bravin A, Prezado Y, Segebarth C, Rémy C, Lahrech H.	Characterization and quantification of cerebral edema induced by synchrotron x-ray microbeam radiation therapy	2008	Physics in Medicine & Biology	10.1088/0031-9155/53/5/001		312		0.118483	0.881517		25	211	186	No observable cerebral oedema, no significant difference in water content, almost 0 within error bars to control						5
Institut für Pathologie der Universität Bern, Bern, Switzerland; Brookhaven National Lab. (United States), Rhausler Inc. (United States), Univ. of Bern (Switzerland)	JA Laissue MD, H Blattmann PhD, H P Wagner MD, M A Grotzer MD, D N Slatkin MD; A. L. Hanson, D. N. Slatkin, J. A. Laissue	Prospects for microbeam radiation therapy of brain tumours in children to reduce neurological sequelae; Unidirectional x-ray microbeam radiosurgery of infantile neuraxial malignancies: estimations of tolerable valley doses	2007; 2013	Developmental Medicine & Child Neurology; Photonic Therapeutics and Diagnostics	10.1111/j.1469-8749.2007.00577.x; 10.1117/12.2004194	46.9667	150	9.5	0.266667	0.733333	15.7895	28	105	77	Significant cerebellar hypoplasia; microcalcifications in 90% of animals						1
Institut für Pathologie der Universität Bern, Bern, Switzerland; Brookhaven National Lab. (United States), Rhausler Inc. (United States), Univ. of Bern (Switzerland)	JA Laissue MD, H Blattmann PhD, H P Wagner MD, M A Grotzer MD, D N Slatkin MD; A. L. Hanson, D. N. Slatkin, J. A. Laissue	Prospects for microbeam radiation therapy of brain tumours in children to reduce neurological sequelae; Unidirectional x-ray microbeam radiosurgery of infantile neuraxial malignancies: estimations of tolerable valley doses	2007; 2013	Developmental Medicine & Child Neurology; Photonic Therapeutics and Diagnostics	10.1111/j.1469-8749.2007.00577.x; 10.1117/12.2004194	15.6067	50	3.1	0.266667	0.733333	16.129	28	105	77	Moderate cerebellar hypoplasia; microcalcifications in 4% of animals						3
Institut für Pathologie der Universität Bern, Bern, Switzerland; Brookhaven National Lab. (United States), Rhausler Inc. (United States), Univ. of Bern (Switzerland)	JA Laissue MD, H Blattmann PhD, H P Wagner MD, M A Grotzer MD, D N Slatkin MD; A. L. Hanson, D. N. Slatkin, J. A. Laissue	Prospects for microbeam radiation therapy of brain tumours in children to reduce neurological sequelae; Unidirectional x-ray microbeam radiosurgery of infantile neuraxial malignancies: estimations of tolerable valley doses	2007; 2013	Developmental Medicine & Child Neurology; Photonic Therapeutics and Diagnostics	10.1111/j.1469-8749.2007.00577.x; 10.1117/12.2004194	22.34	150	2.7	0.133333	0.866667	55.5556	28	210	182	Moderate cerebellar hypoplasia; microcalcifications in 10% of animals						3
Institut für Pathologie der Universität Bern, Bern, Switzerland; Brookhaven National Lab. (United States), Rhausler Inc. (United States), Univ. of Bern (Switzerland)	JA Laissue MD, H Blattmann PhD, H P Wagner MD, M A Grotzer MD, D N Slatkin MD; A. L. Hanson, D. N. Slatkin, J. A. Laissue	Prospects for microbeam radiation therapy of brain tumours in children to reduce neurological sequelae; Unidirectional x-ray microbeam radiosurgery of infantile neuraxial malignancies: estimations of tolerable valley doses	2007; 2013	Developmental Medicine & Child Neurology; Photonic Therapeutics and Diagnostics	10.1111/j.1469-8749.2007.00577.x; 10.1117/12.2004194	7.44667	50	0.9	0.133333	0.866667	55.5556	28	210	182	Slight cerebellar hypoplasia; no microcalcifications observed						4
															White matter necrosis	Microcalcification	Vasculatization	Local minor edema
Medical Department, Brookhaven National Laboratory, Upton, NY 11973, USA.	F Avraham Dilmanian, Terry M Button, Géraldine Le Duc, Nan Zhong, Louis A Peña, Jennifer A L Smith, Steve R Martinez, Tigran Bacarian, Jennifer Tammam, Baorui Ren, Peter M Farmer, John Kalef-Ezra, Peggy L Micca, Marta M Nawrocky, James A Niederer, F Peter Recksiek, Alexander Fuchs, Eliot M Rosen	Response of rat intracranial 9L gliosarcoma to microbeam radiation therapy	2002	Journal of Neuro-oncology	10.1093/neuonc/4.1.26	135	300	40	0.54	0.46	7.5	27	50	23	Small	Small	Strong with calcification	Small			2
Medical Department, Brookhaven National Laboratory, Upton, NY 11973, USA.	F Avraham Dilmanian, Terry M Button, Géraldine Le Duc, Nan Zhong, Louis A Peña, Jennifer A L Smith, Steve R Martinez, Tigran Bacarian, Jennifer Tammam, Baorui Ren, Peter M Farmer, John Kalef-Ezra, Peggy L Micca, Marta M Nawrocky, James A Niederer, F Peter Recksiek, Alexander Fuchs, Eliot M Rosen	Response of rat intracranial 9L gliosarcoma to microbeam radiation therapy	2002	Journal of Neuro-oncology	10.1093/neuonc/4.1.26	113	250	34	0.54	0.46	7.35294	27	50	23	Small	Strong	Small	None			1
Medical Department, Brookhaven National Laboratory, Upton, NY 11973, USA.	F Avraham Dilmanian, Terry M Button, Géraldine Le Duc, Nan Zhong, Louis A Peña, Jennifer A L Smith, Steve R Martinez, Tigran Bacarian, Jennifer Tammam, Baorui Ren, Peter M Farmer, John Kalef-Ezra, Peggy L Micca, Marta M Nawrocky, James A Niederer, F Peter Recksiek, Alexander Fuchs, Eliot M Rosen	Response of rat intracranial 9L gliosarcoma to microbeam radiation therapy	2002	Journal of Neuro-oncology	10.1093/neuonc/4.1.26	113	250	34	0.54	0.46	7.35294	27	50	23	None	Strong	None	None			1.5
Medical Department, Brookhaven National Laboratory, Upton, NY 11973, USA.	F Avraham Dilmanian, Terry M Button, Géraldine Le Duc, Nan Zhong, Louis A Peña, Jennifer A L Smith, Steve R Martinez, Tigran Bacarian, Jennifer Tammam, Baorui Ren, Peter M Farmer, John Kalef-Ezra, Peggy L Micca, Marta M Nawrocky, James A Niederer, F Peter Recksiek, Alexander Fuchs, Eliot M Rosen	Response of rat intracranial 9L gliosarcoma to microbeam radiation therapy	2002	Journal of Neuro-oncology	10.1093/neuonc/4.1.26		500		0.54	0.46		27	50	23	None	Small	Small	Small			2
Medical Department, Brookhaven National Laboratory, Upton, NY 11973, USA.	F Avraham Dilmanian, Terry M Button, Géraldine Le Duc, Nan Zhong, Louis A Peña, Jennifer A L Smith, Steve R Martinez, Tigran Bacarian, Jennifer Tammam, Baorui Ren, Peter M Farmer, John Kalef-Ezra, Peggy L Micca, Marta M Nawrocky, James A Niederer, F Peter Recksiek, Alexander Fuchs, Eliot M Rosen	Response of rat intracranial 9L gliosarcoma to microbeam radiation therapy	2002	Journal of Neuro-oncology	10.1093/neuonc/4.1.26		500		0.54	0.46		27	50	23	None	Strong	Medium	Medium			1
Medical Department, Brookhaven National Laboratory, Upton, NY 11973, USA.	F Avraham Dilmanian, Terry M Button, Géraldine Le Duc, Nan Zhong, Louis A Peña, Jennifer A L Smith, Steve R Martinez, Tigran Bacarian, Jennifer Tammam, Baorui Ren, Peter M Farmer, John Kalef-Ezra, Peggy L Micca, Marta M Nawrocky, James A Niederer, F Peter Recksiek, Alexander Fuchs, Eliot M Rosen	Response of rat intracranial 9L gliosarcoma to microbeam radiation therapy	2002	Journal of Neuro-oncology	10.1093/neuonc/4.1.26	158	500	33	0.36	0.64	15.1515	27	75	48	Medium	Medium	Medium	Small			1
Medical Department, Brookhaven National Laboratory, Upton, NY 11973, USA.	F Avraham Dilmanian, Terry M Button, Géraldine Le Duc, Nan Zhong, Louis A Peña, Jennifer A L Smith, Steve R Martinez, Tigran Bacarian, Jennifer Tammam, Baorui Ren, Peter M Farmer, John Kalef-Ezra, Peggy L Micca, Marta M Nawrocky, James A Niederer, F Peter Recksiek, Alexander Fuchs, Eliot M Rosen	Response of rat intracranial 9L gliosarcoma to microbeam radiation therapy	2002	Journal of Neuro-oncology	10.1093/neuonc/4.1.26	79	250	17	0.36	0.64	14.7059	27	75	48	None	Strong	None	Small			1.5
Medical Department, Brookhaven National Laboratory, Upton, NY 11973, USA.	F Avraham Dilmanian, Terry M Button, Géraldine Le Duc, Nan Zhong, Louis A Peña, Jennifer A L Smith, Steve R Martinez, Tigran Bacarian, Jennifer Tammam, Baorui Ren, Peter M Farmer, John Kalef-Ezra, Peggy L Micca, Marta M Nawrocky, James A Niederer, F Peter Recksiek, Alexander Fuchs, Eliot M Rosen	Response of rat intracranial 9L gliosarcoma to microbeam radiation therapy	2002	Journal of Neuro-oncology	10.1093/neuonc/4.1.26	118	500	19	0.27	0.73	26.3158	27	100	73	None	Strong	None	None			1.5
Institute of Pathology, University of Bern, Switzerland.	J A Laissue, G Geiser, P O Spanne, F A Dilmanian, J O Gebbers, M Geiser, X Y Wu, M S Makar, P L Micca, M M Nawrocky, D D Joel, D N Slatkin	Neuropathology of ablation of rat gliosarcomas and contiguous brain tissues using a microplanar beam of synchrotron-wiggler-generated X rays.	1998	International Journal of Cancer	10.1002/(sici)1097-0215(19981123)78:5<654::aid-ijc21>3.0.co;2-l		625		0.25	0.75		25	100	75	Brain damage index over double control for 3 brain areas, the same as control in 5, loss of tissue structure						2
Medical Department, Brookhaven National Laboratory, Upton, NY 11973-5000, USA.	D N Slatkin, P Spanne, F A Dilmanian, J O Gebbers, J A Laissue	Subacute neuropathological effects of microplanar beams of x-rays from a synchrotron wiggler	1995	Proceedings of the National Academy of Sciences	10.1073/pnas.92.19.8783		625		0.1	0.9		20	200	180	No change						5
Medical Department, Brookhaven National Laboratory, Upton, NY 11973-5000, USA.	D N Slatkin, P Spanne, F A Dilmanian, J O Gebbers, J A Laissue	Subacute neuropathological effects of microplanar beams of x-rays from a synchrotron wiggler	1995	Proceedings of the National Academy of Sciences	10.1073/pnas.92.19.8783		625		0.1	0.9		20	200	180	No change						5
Medical Department, Brookhaven National Laboratory, Upton, NY 11973-5000, USA.	D N Slatkin, P Spanne, F A Dilmanian, J O Gebbers, J A Laissue	Subacute neuropathological effects of microplanar beams of x-rays from a synchrotron wiggler	1995	Proceedings of the National Academy of Sciences	10.1073/pnas.92.19.8783		312		0.1	0.9		20	200	180	No change						5
Medical Department, Brookhaven National Laboratory, Upton, NY 11973-5000, USA.	D N Slatkin, P Spanne, F A Dilmanian, J O Gebbers, J A Laissue	Subacute neuropathological effects of microplanar beams of x-rays from a synchrotron wiggler	1995	Proceedings of the National Academy of Sciences	10.1073/pnas.92.19.8783		312		0.185	0.815		37	200	163	No change						5
Medical Department, Brookhaven National Laboratory, Upton, NY 11973-5000, USA.	D N Slatkin, P Spanne, F A Dilmanian, J O Gebbers, J A Laissue	Subacute neuropathological effects of microplanar beams of x-rays from a synchrotron wiggler	1995	Proceedings of the National Academy of Sciences	10.1073/pnas.92.19.8783		312		0.493333	0.506667		37	75	38	No change						5
Medical Department, Brookhaven National Laboratory, Upton, NY 11973-5000, USA.	D N Slatkin, P Spanne, F A Dilmanian, J O Gebbers, J A Laissue	Subacute neuropathological effects of microplanar beams of x-rays from a synchrotron wiggler	1995	Proceedings of the National Academy of Sciences	10.1073/pnas.92.19.8783		625		0.185	0.815		37	200	163	No change						5
Medical Department, Brookhaven National Laboratory, Upton, NY 11973-5000, USA.	D N Slatkin, P Spanne, F A Dilmanian, J O Gebbers, J A Laissue	Subacute neuropathological effects of microplanar beams of x-rays from a synchrotron wiggler	1995	Proceedings of the National Academy of Sciences	10.1073/pnas.92.19.8783		625		0.493333	0.506667		37	75	38	No change						5
Institute of Pathology, University of Bern, Switzerland; Deutsches Krebsforschungszentrum, Heidelberg, Germany; European Synchrotron Radiation Facility, Grenoble, France; Institute of Anatomy, University of Bern, Bern, Switzerland; Brookhaven National Laboratory, NY, USA; Particle Therapy Cancer Research Institute, University of Oxford, UK; Animal Oncology and Imaging Center, Hünenberg, Switzerla…	Jean A. Laissue, Stefan Bartzsch, Hans Blattmann, Elke Bräuer-Krisch, Alberto Bravin, Dominique Dalléry, Valentin Djonov, Albert L. Hanson, John W. Hopewell, Barbara Kaser-Hotz, Jani Keyriläinen, Pierre Philippe Laissue, Michiko Miura, Raphaël Serduc, Albert E. Siegbahn, Daniel N. Slatkin	Response of the rat spinal cord to X-ray microbeams	2013	Radiotherapy and Oncology	10.1016/j.radonc.2012.12.007.	49.6667	253	9	0.166667	0.833333	28.1111	35	210	175	Paralysis free at 383 days post irradiation, lesions						5
Institute of Pathology, University of Bern, Switzerland; Deutsches Krebsforschungszentrum, Heidelberg, Germany; European Synchrotron Radiation Facility, Grenoble, France; Institute of Anatomy, University of Bern, Bern, Switzerland; Brookhaven National Laboratory, NY, USA; Particle Therapy Cancer Research Institute, University of Oxford, UK; Animal Oncology and Imaging Center, Hünenberg, Switzerla…	Jean A. Laissue, Stefan Bartzsch, Hans Blattmann, Elke Bräuer-Krisch, Alberto Bravin, Dominique Dalléry, Valentin Djonov, Albert L. Hanson, John W. Hopewell, Barbara Kaser-Hotz, Jani Keyriläinen, Pierre Philippe Laissue, Michiko Miura, Raphaël Serduc, Albert E. Siegbahn, Daniel N. Slatkin	Response of the rat spinal cord to X-ray microbeams	2013	Radiotherapy and Oncology	10.1016/j.radonc.2012.12.007.	70.0833	357	12.7	0.166667	0.833333	28.1102	35	210	175	Spinal cord tissue appears histologically normal, lesions in 3/10 rats, small portion of rats experienced weightloss						3
Institute of Pathology, University of Bern, Switzerland; Deutsches Krebsforschungszentrum, Heidelberg, Germany; European Synchrotron Radiation Facility, Grenoble, France; Institute of Anatomy, University of Bern, Bern, Switzerland; Brookhaven National Laboratory, NY, USA; Particle Therapy Cancer Research Institute, University of Oxford, UK; Animal Oncology and Imaging Center, Hünenberg, Switzerla…	Jean A. Laissue, Stefan Bartzsch, Hans Blattmann, Elke Bräuer-Krisch, Alberto Bravin, Dominique Dalléry, Valentin Djonov, Albert L. Hanson, John W. Hopewell, Barbara Kaser-Hotz, Jani Keyriläinen, Pierre Philippe Laissue, Michiko Miura, Raphaël Serduc, Albert E. Siegbahn, Daniel N. Slatkin	Response of the rat spinal cord to X-ray microbeams	2013	Radiotherapy and Oncology	10.1016/j.radonc.2012.12.007.	73.2167	373.3	13.2	0.166667	0.833333	28.2803	35	210	175	Dose calculated to cause paralysis in 50% of rats, weight loss in all rats						1
Institute of Pathology, University of Bern, Switzerland; Deutsches Krebsforschungszentrum, Heidelberg, Germany; European Synchrotron Radiation Facility, Grenoble, France; Institute of Anatomy, University of Bern, Bern, Switzerland; Brookhaven National Laboratory, NY, USA; Particle Therapy Cancer Research Institute, University of Oxford, UK; Animal Oncology and Imaging Center, Hünenberg, Switzerla…	Jean A. Laissue, Stefan Bartzsch, Hans Blattmann, Elke Bräuer-Krisch, Alberto Bravin, Dominique Dalléry, Valentin Djonov, Albert L. Hanson, John W. Hopewell, Barbara Kaser-Hotz, Jani Keyriläinen, Pierre Philippe Laissue, Michiko Miura, Raphaël Serduc, Albert E. Siegbahn, Daniel N. Slatkin	Response of the rat spinal cord to X-ray microbeams	2013	Radiotherapy and Oncology	10.1016/j.radonc.2012.12.007.	99.5	507	18	0.166667	0.833333	28.1667	35	210	175	Lesions, focal white matter necrosis, florid focal gray matter necrosis, fibrinoid necrosis of microvessels, leukocytic infiltrates, and space-occupying lesions in some cases, weightloss						1
															Moist desquamation	Complete epilation	Failures to nearly fully regrow hair within 7 months
Medical Department, Brookhaven National Laboratory, Upton, New York 11973; Research Institute, Churchill Hospital, Oxford, OX3 7LJ, United Kingdom; Biology Department, Brookhaven National Laboratory, Upton, New York 11973; Department of Medical Physics, University of Ioannina, Ioannina 45110, Greece; Pharmacyclics, Inc., Sunnyvale, California 94086; Department of Radiation Oncology, Long Island J…	F. Avraham Dilmanian, Gerard M. Morris, Nan Zhong, Tigran Bacarian, James F. Hainfeld, John Kalef-Ezra, Laura J. Brewington, Jennifer Tammam, Eliot M. Rosen	Murine EMT-6 carcinoma: High therapeutic efficacy of microbeam radiation therapy.	2003	Radiation Research	10.1667/0033-7587(2003)159[0632:mechte]2.0.co;2	254	410	16	0.3	0.7	25.625	90	300	210	0/8	45139	44986				3
Medical Department, Brookhaven National Laboratory, Upton, New York 11973; Research Institute, Churchill Hospital, Oxford, OX3 7LJ, United Kingdom; Biology Department, Brookhaven National Laboratory, Upton, New York 11973; Department of Medical Physics, University of Ioannina, Ioannina 45110, Greece; Pharmacyclics, Inc., Sunnyvale, California 94086; Department of Radiation Oncology, Long Island J…	F. Avraham Dilmanian, Gerard M. Morris, Nan Zhong, Tigran Bacarian, James F. Hainfeld, John Kalef-Ezra, Laura J. Brewington, Jennifer Tammam, Eliot M. Rosen	Murine EMT-6 carcinoma: High therapeutic efficacy of microbeam radiation therapy.	2003	Radiation Research	10.1667/0033-7587(2003)159[0632:mechte]2.0.co;2	322	520	21	0.3	0.7	24.7619	90	300	210	0/8	45140	45017				2
Medical Department, Brookhaven National Laboratory, Upton, New York 11973; Research Institute, Churchill Hospital, Oxford, OX3 7LJ, United Kingdom; Biology Department, Brookhaven National Laboratory, Upton, New York 11973; Department of Medical Physics, University of Ioannina, Ioannina 45110, Greece; Pharmacyclics, Inc., Sunnyvale, California 94086; Department of Radiation Oncology, Long Island J…	F. Avraham Dilmanian, Gerard M. Morris, Nan Zhong, Tigran Bacarian, James F. Hainfeld, John Kalef-Ezra, Laura J. Brewington, Jennifer Tammam, Eliot M. Rosen	Murine EMT-6 carcinoma: High therapeutic efficacy of microbeam radiation therapy.	2003	Radiation Research	10.1667/0033-7587(2003)159[0632:mechte]2.0.co;2	403	650	26	0.3	0.7	25	90	300	210	0/7	45109	45080				2
Department of Pathology, Southern Health, Monash Medical Centre, Clayton, Victoria, Australia.	R C U Priyadarshika, J C Crosbie, B Kumar and P A W Rogers	Biodosimetric quantification of short-term synchrotron microbeam versus broad-beam radiation damage to mouse skin using a dermatopathological scoring system	2014	The British Journal of Radiology	10.1259/bjr/58503354	55.25	400	6	0.125	0.875	66.6667	25	200	175	Not significantly different to low dose BB but greater than control for epidermal cell death, spongiosis, nuclear enlargement and dermal leukocytic infiltration						3
Department of Pathology, Southern Health, Monash Medical Centre, Clayton, Victoria, Australia.	R C U Priyadarshika, J C Crosbie, B Kumar and P A W Rogers	Biodosimetric quantification of short-term synchrotron microbeam versus broad-beam radiation damage to mouse skin using a dermatopathological scoring system	2014	The British Journal of Radiology	10.1259/bjr/58503354	27.625	200	3	0.125	0.875	66.6667	25	200	175	Not significantly different to low dose BB but greater than control for epidermal cell death, adnexal damage, spongiosis, nuclear enlargement and dermal leukocytic infiltration						3
INSERM U836, Institute of Neuroscience Grenoble, France; European Synchrotron Radiation Facility, Grenoble, France; Department of Oncology and Pathology, Karolinska Institutet, Stockholm, Sweden; CNRS UMR 5588, Physical Spectroscopy, Grenoble, France; Institute of Pathology, University of Bern, Switzerland	Boudewijn van der Sanden, Elke Bräuer-Krisch, Erik Albert Siegbahn, Clément Ricard, Jean-Claude Vial, Jean Laissue	Healthy mice- Left hind leg, including saphenous artery	2010	International Journal of Radiation Oncology*Biology*Physics	10.1016/j.ijrobp.2010.02.019	41.3625	312	2.7	0.125	0.875	115.556	50	400	350	Stable thinning of tunica media in peak regions, hypertrophy of tunica media in valley regions; no vascular occlusions, no skin reactions, behavioral changes, or weight loss						4
Key:	Black text	From paper
	Red text	Calculated
