# Supplementary material for: On the significance of the different geometrical and dosimetric parameters in microbeam and minibeam radiation therapy a retrospective evaluation
Source: Front Oncol. 2024 Sep 27;14:1449293. doi: 10.3389/fonc.2024.1449293 (PMC11472836; doi:10.3389/fonc.2024.1449293)
Supplement: Supplementary file 2 [file Table2.xlsx]

## Sheet: Sheet1
Facility	Authors	Title	Publication Date	Journal	DOI	Volume Average Dose (Gy)	Peak Dose (Gy)	Valley Dose (Gy)	% Peak Dose	% Valley Dose	PVDR	Width (um)	Spacing (um)	Valley Width (um)	Result	NTSS
Institut Curie, Université PSL, CNRS UMR3347, Inserm U1021, Signalisation Radiobiologie et Cancer, 91400 Orsay, France; Université Paris-Saclay, CNRS UMR3347, Inserm U1021, Signalisation Radiobiologie et Cancer, 91400 Orsay, France; Department of Charged Particle Therapy Research, National Institute of Radiological Sciences (NIRS), National Institutes for Quantum and Radiological Science and Tech…	Yolanda Prezado, Ryochi Hirayama, Naruhiro Matsufuji, Taku Inaniwa, Immaculada Martínez-Rovira, Olivier Seksek, Annaïg Bertho, Sachiko Koike, Dalila Labiod, Frederic Pouzoulet, Laura Polledo, Nils Warfving, Aléthéa Liens, Judith Bergs, Takashi Shimokawa	A Potential Renewed Use of Very Heavy Ions for Therapy: Neon Minibeam Radiation Therapy	2021	Cancers	10.3390/cancers13061356	20	60	1.1	0.2	0.8	54.5455	700	3500	2800	No necrosis or edema, low grade annexa decrease, inflammation & hyperplasia. 2-3 times more normal tissue sparing than broad beam	4
Department of Radiation Oncology, Vanderbilt University School of Medicine, Nashville, TN 37232, USA.; Department of Radiation Oncology, University of Maryland School of Medicine, Baltimore, MD 21201, USA; Department of Anatomy and Neurobiology, University of Maryland School of Medicine, Baltimore, MD 21201, USA; Brookhaven National Laboratory, Upton, NY 11973, USA; NASA Space Radiation Laborator…	Eley JG, Haga CW, Keller A, Lazenby EM, Raver C, Rusek A, Dilmanian FA, Krishnan S, Waddell	Heavy Ion Minibeam Therapy: Side Effects in Normal Brain	2021	Cancers	10.3390/cancers13246207	20	62.4	2.7	0.3	0.7	23.1111	300	1000	700	Reduced dematitis compared to solid beam but more than control, cognitive impairment & chronic pathologic damage seen in normal rodent brain similar to solid-beam therapy response, higher levels of neuroinflammation	3
Laboratoire d’Imagerie et Modélisation en Neurobiologie et Cancérologie (IMNC), Centre National de la Recherche Scientifique (CNRS); Universités Paris 11 and Paris 7, Campus d’Orsay, 91405, Orsay, France; Institut Pasteur, Histopathologie Humaine et Modèles Animaux, Institut Pasteur, 28 Rue du Docteur Roux, 75015, Paris, France; Institut Curie - Centre de Protonthérapie d’Orsay, Campus Universita…	Yolanda Prezado, Gregory Jouvion, David Hardy, Annalisa Patriarca, Catherine Nauraye, Judith Bergs, Wilfredo González, Consuelo Guardiola, Marjorie Juchaux, Dalila Labiod, Remi Dendale, Laurène Jourdain, Catherine Sebrie & Frederic Pouzoulet	Proton minibeam radiation therapy spares normal rat brain: Long-Term Clinical, Radiological and Histopathological Analysis	2017	Scientific Reports	10.1038/s41598-017-14786-y	25	57	8.76923	0.125	0.875	6.5	400	3200	2800	Rats irradiated with pMBRT showed reversible epilation in pMBRT path, no weight loss, only one out of the eight irradiated animals presented lesions, which were significantly less severe than those observed in the standard proton therapy (PT) group; this animal exhibited only very few microglial nodules. No large foci of necrosis nor cavitation were observed in any of the rats in this series, sig…	3
Department of Radiation Oncology, Vanderbilt University School of Medicine, 2220 Pierce Avenue, Preston Research Building B1003, Nashville, TN 37232 USA; Department of Radiation Oncology, The University of Texas MD Anderson Cancer Center, 1515 Holcombe Boulevard, Houston, TX 77030 USA; Department of Symptom Research, The University of Texas MD Anderson Cancer Center, 1515 Holcombe Boulevard, Hous…	Eley JG, Chadha AS, Quini C, Vichaya EG, Zhang C, Davis J, Sahoo N, Waddell J, Leiser D, Dilmanian FA, Krishnan S	Pilot study of neurologic toxicity in mice after proton minibeam therapy	2020	Scientific Reports	10.1038/s41598-020-68015-0	10.2518	33.1	0.459722	0.3	0.7	72	300	1000	700	Mild epilation L1 (BB was moderate for same dose, L2), no significant differences with BB for recognition tasks, reduced gliosis in the MB10 group.	3
Department of Radiation Oncology, Vanderbilt University School of Medicine, 2220 Pierce Avenue, Preston Research Building B1003, Nashville, TN 37232 USA; Department of Radiation Oncology, The University of Texas MD Anderson Cancer Center, 1515 Holcombe Boulevard, Houston, TX 77030 USA; Department of Symptom Research, The University of Texas MD Anderson Cancer Center, 1515 Holcombe Boulevard, Hous…	Eley JG, Chadha AS, Quini C, Vichaya EG, Zhang C, Davis J, Sahoo N, Waddell J, Leiser D, Dilmanian FA, Krishnan S	Pilot study of neurologic toxicity in mice after proton minibeam therapy	2020	Scientific Reports	10.1038/s41598-020-68015-0	30.7554	99.3	1.37917	0.3	0.7	72	300	1000	700	Moderate epilation L2 (BB was severe for same dose, L3), no significant differences with BB for recognition tasks	2
Translational Research Department, Experimental Radiotherapy Platform, Institut Curie, PSL Research University, Orsay, France; Université Paris-Saclay, CNRS, Institut des Neurosciences Paris-Saclay, 91190, Gif-sur-Yvette, France; Laboratoire de Physique des 2 Infinis Irène Joliot-Curie (IJCLab-UMR 9012), CNRS/Université Paris-Saclay/Université de Paris, Campus Universitaire, Orsay, France; Radiat…	Charlotte Lamirault, Valérie Doyère, Marjorie Juchaux, Frederic Pouzoulet, Dalila Labiod, Remi Dendale, Annalisa Patriarca, Catherine Nauraye, Marine Le Dudal, Grégory Jouvion, David Hardy, Nicole El Massioui & Yolanda Prezado	Short and long-term evaluation of the impact of proton minibeam radiation therapy on motor, emotional and cognitive functions	2020	Scientific Reports	10.1038/s41598-020-70371-w	25	57	8.8			6.47727	1100			Growth perturbation- slightly lower (12.5%) body weight and size, no significant change in locomotor activity, motor coordination, or muscular tonus unlike CONV, no change in anxiety level unlike CONV, no major deficiency in spatial learning, spatial memory, spatial strategy or recognition memory at any time after irradiation, suggesting that the integrity of the hippocampus was maintained unlike…	4
Imagerie et Modélisation pour la Neurobiologie et la Cancérologie, UMR 8165, CNRS, Bât. 440, Campus d'Orsay, 91405, France; ID 17 Biomedical Beamline (ESRF), 38000, Grenoble, France; INSERM U838, Équipe 6, Grenoble Institut de Neurosciences, Grenoble, France; Service de Neuropathologie Hôpital Sainte-Anne, 75014 Paris, France; ' Institut Pasteur, Histopathologic Humaine et Modèles Animaux, 75015 …	Yolanda Prezado, Pierre Deman, Pascale Verlet, Gregory Jouvion, Silvia Gil, Céline Le Clec'H, Hélène Bernard, Géraldine Le Duc, Sukhena Sarun	Tolerance to Dose Escalation in Minibeam Radiation Therapy Applied to Normal Rat Brain: Long-Term Clinical, Radiological and Histopathological Analysis	2015	Radiation Research Society	10.1667/RR14018.1	26.65	50	3.3	0.5	0.5	15.1515	600	1200	600	Long term survival, no significant weight change observed, no significant MRI abnormalities, no significant histopathological abnormalities observed	5
Imagerie et Modélisation pour la Neurobiologie et la Cancérologie, UMR 8165, CNRS, Bât. 440, Campus d'Orsay, 91405, France; ID 17 Biomedical Beamline (ESRF), 38000, Grenoble, France; INSERM U838, Équipe 6, Grenoble Institut de Neurosciences, Grenoble, France; Service de Neuropathologie Hôpital Sainte-Anne, 75014 Paris, France; ' Institut Pasteur, Histopathologic Humaine et Modèles Animaux, 75015 …	Yolanda Prezado, Pierre Deman, Pascale Verlet, Gregory Jouvion, Silvia Gil, Céline Le Clec'H, Hélène Bernard, Géraldine Le Duc, Sukhena Sarun	Tolerance to Dose Escalation in Minibeam Radiation Therapy Applied to Normal Rat Brain: Long-Term Clinical, Radiological and Histopathological Analysis	2015	Radiation Research Society	10.1667/RR14018.1	53.3	100	6.6	0.5	0.5	15.1515	600	1200	600	Long term survival, short term damage & long term microcalcifications in hippocampi, transitory and less important radiation-induced effects observed, no significant weight change	2
Imagerie et Modélisation pour la Neurobiologie et la Cancérologie, UMR 8165, CNRS, Bât. 440, Campus d'Orsay, 91405, France; ID 17 Biomedical Beamline (ESRF), 38000, Grenoble, France; INSERM U838, Équipe 6, Grenoble Institut de Neurosciences, Grenoble, France; Service de Neuropathologie Hôpital Sainte-Anne, 75014 Paris, France; ' Institut Pasteur, Histopathologic Humaine et Modèles Animaux, 75015 …	Yolanda Prezado, Pierre Deman, Pascale Verlet, Gregory Jouvion, Silvia Gil, Céline Le Clec'H, Hélène Bernard, Géraldine Le Duc, Sukhena Sarun	Tolerance to Dose Escalation in Minibeam Radiation Therapy Applied to Normal Rat Brain: Long-Term Clinical, Radiological and Histopathological Analysis	2015	Radiation Research Society	10.1667/RR14018.1	80	150	10	0.5	0.5	15	600	1200	600	Long term survival, short & long term damage, hematomes, calcifications, radionecrosis, significant brain damage	1
Imagerie et Modélisation pour la Neurobiologie et la Cancérologie, UMR 8165, CNRS, Bât. 440, Campus d'Orsay, 91405, France; ID 17 Biomedical Beamline (ESRF), 38000, Grenoble, France; INSERM U838, Équipe 6, Grenoble Institut de Neurosciences, Grenoble, France; Service de Neuropathologie Hôpital Sainte-Anne, 75014 Paris, France; ' Institut Pasteur, Histopathologic Humaine et Modèles Animaux, 75015 …	Yolanda Prezado, Pierre Deman, Pascale Verlet, Gregory Jouvion, Silvia Gil, Céline Le Clec'H, Hélène Bernard, Géraldine Le Duc, Sukhena Sarun	Tolerance to Dose Escalation in Minibeam Radiation Therapy Applied to Normal Rat Brain: Long-Term Clinical, Radiological and Histopathological Analysis	2015	Radiation Research Society	10.1667/RR14018.1	106.65	200	13.3	0.5	0.5	15.0376	600	1200	600	Early Deaths/ Abnormal behaviour	1
Imagerie et Modélisation pour la Neurobiologie et la Cancérologie, UMR 8165, CNRS, Bât. 440, Campus d'Orsay, 91405, France; ID 17 Biomedical Beamline (ESRF), 38000, Grenoble, France; INSERM U838, Équipe 6, Grenoble Institut de Neurosciences, Grenoble, France; Service de Neuropathologie Hôpital Sainte-Anne, 75014 Paris, France; ' Institut Pasteur, Histopathologic Humaine et Modèles Animaux, 75015 …	Yolanda Prezado, Pierre Deman, Pascale Verlet, Gregory Jouvion, Silvia Gil, Céline Le Clec'H, Hélène Bernard, Géraldine Le Duc, Sukhena Sarun	Tolerance to Dose Escalation in Minibeam Radiation Therapy Applied to Normal Rat Brain: Long-Term Clinical, Radiological and Histopathological Analysis	2015	Radiation Research Society	10.1667/RR14018.1	133.3	250	16.6	0.5	0.5	15.0602	600	1200	600	Early Deaths/ Abnormal behaviour	1
Imagerie et Modélisation pour la Neurobiologie et la Cancérologie, UMR 8165, CNRS, Bât. 440, Campus d'Orsay, 91405, France; ID 17 Biomedical Beamline (ESRF), 38000, Grenoble, France; INSERM U838, Équipe 6, Grenoble Institut de Neurosciences, Grenoble, France; Service de Neuropathologie Hôpital Sainte-Anne, 75014 Paris, France; ' Institut Pasteur, Histopathologic Humaine et Modèles Animaux, 75015 …	Yolanda Prezado, Pierre Deman, Pascale Verlet, Gregory Jouvion, Silvia Gil, Céline Le Clec'H, Hélène Bernard, Géraldine Le Duc, Sukhena Sarun	Tolerance to Dose Escalation in Minibeam Radiation Therapy Applied to Normal Rat Brain: Long-Term Clinical, Radiological and Histopathological Analysis	2015	Radiation Research Society	10.1667/RR14018.1	213	400	26	0.5	0.5	15.3846	600	1200	600	Early Deaths/ Abnormal behaviour	1
Institut Curie, Université PSL, CNRS UMR3347, Inserm U1021, Signalisation radiobiologie et cancer, 91400 Orsay, France; Institut Pasteur, Neuropathologie Expérimentale, 75015 Paris, France; Laboratoire d’Histopathologie, VetAgro-Sup, Université de Lyon, Marcy l’Etoile, Lyon, France; Ecole Nationale Vétérinaire d’Alfort, Biopôle, Unité d’Histologie, d’Embryologie et d’Anatomie Pathologique Univers…	Marios Sotiropoulos, Elise Brisebard, Marine Le Dudal, Gregory Jouvion, Marjorie Juchaux, Delphine Crépin, Catherine Sebrie, Laurene Jourdain, Dalila Labiod, Charlotte Lamirault, Frederic Pouzoulet, Yolanda Prezado	X-rays minibeam radiation therapy at a conventional irradiator: Pilot evaluation in F98-glioma bearing rats and dose calculations in a human phantom	2021	Radiation Oncology	10.1016/j.ctro.2021.01.001	20	57	5	0.477816	0.522184	11.4	700	1465	765	MRI- No lesions six months later, Histopathology- minimal to mild lesions: oedema, small foci of mineralisation in 4/6 rats: in 2/6 larger and/or multifocal destruction/mineralisation in the thalamus observed	2
Institut Curie, Université PSL, CNRS UMR3347, Inserm U1021, Signalisation radiobiologie et cancer, 91400 Orsay, France; Institut Pasteur, Neuropathologie Expérimentale, 75015 Paris, France; Laboratoire d’Histopathologie, VetAgro-Sup, Université de Lyon, Marcy l’Etoile, Lyon, France; Ecole Nationale Vétérinaire d’Alfort, Biopôle, Unité d’Histologie, d’Embryologie et d’Anatomie Pathologique Univers…	Marios Sotiropoulos, Elise Brisebard, Marine Le Dudal, Gregory Jouvion, Marjorie Juchaux, Delphine Crépin, Catherine Sebrie, Laurene Jourdain, Dalila Labiod, Charlotte Lamirault, Frederic Pouzoulet, Yolanda Prezado	X-rays minibeam radiation therapy at a conventional irradiator: Pilot evaluation in F98-glioma bearing rats and dose calculations in a human phantom	2021	Radiation Oncology	10.1016/j.ctro.2021.01.001	28	81	7.2	0.477816	0.522184	11.25	700	1465	765	MRI- Severe lesions in both brain hemispheres at six months, Histopathology- lesions were marked to severe, with large foci of neuropil destruction/mineralisation observed in all the rats, mostly in the thalamus and the cortex	1
CNRS UMR3347, Inserm U1021, Signalisation Radiobiologie et Cancer, Institut Curie, Universite PSL, Orsay, France; CNRS UMR3347,Inserm U1021, Signalisation Radiobiologie et Cancer, Universite Paris-Saclay, Orsay, France; UMR703 − PAnTher − APEX, Oniris, Nantes, France; Service Hospitalier Frederic Joliot, CEA, CNRS, Inserm, BIOMAPS Universite Paris-Saclay, Orsay, France; Departement de Recherche T…	Annaig Bertho, Lorea Iturri, Elise Brisebard, Marjorie Juchaux, Cristele Gilbert, Ramon Ortiz, Catherine Sebrie, Laurene Jourdain, Charlotte Lamirault, Gabriel Ramasamy, Frederic Pouzoulet, and Yolanda Prezado	Evaluation of the Role of the Immune System Response After Minibeam Radiation Therapy	2022	Radiation Oncology	10.1016/j.ijrobp.2022.08.011	30	83	4.5	0.5	0.5	18.4444	700	1400	700	No skin toxicity, minimal to mild foci of mineralization in the thalamus and corpus striatum. Significant improvement over CONV	4
Institut Curie, Université PSL, CNRS UMR3347, Inserm U1021, Signalisation Radiobiologie et Cancer, 91400 Orsay, France; Université Paris-Saclay, CNRS UMR3347, Inserm U1021, Signalisation Radiobiologie et Cancer, 91400 Orsay, France; Translational Research Department, Institut Curie, Experimental Radiotherapy Platform, Université Paris Saclay, 91400 Orsay, France; AnaPath GmbH, AnaPath Services, H…	Bertho A, Ortiz R, Juchaux M, Gilbert C, Lamirault C, Pouzoulet F, Polledo L, Liens A, Warfving N, Sebrie C, Jourdain L, Patriarca A, de Marzi L, Prezado Y.	First Evaluation of Temporal and Spatial Fractionation in Proton Minibeam Radiation Therapy of Glioma-Bearing Rats	2021	Cancers	10.3390/cancers13194865	30	59	10.6	0.333333	0.666667	5.56604	400	1200	700	Slight weightloss, no macroscopic skin radiotoxicities unlike BB (severe cutaneous ulceration), multifocal radiation-induced only alopecia along the paths of the minibeams but half experienced weightloss	3
Key:	Black text	From paper
	Red text	Calculated
